# Supplementary material for: Relationship between Vitamin Intake and Depressive Symptoms in Elderly Japanese Individuals: Differences with Gender and Body Mass Index
Source: PubMed Central journal article supplement (PMC5748769; doi:10.3390/nu9121319), 2017-12-03
Supplement: nutrients-09-01319-s001.pdf [file nutrients-09-01319-s001.pdf]

**Relationship between vitamin intake and depressive symptoms in elderly Japanese individuals: Differences with gender and body mass index**

**Supplementary**

Table S1: Participant characteristics stratified by depressive symptoms and non-depressive symptoms groups

|                             |                              | Non-depressive symptoms<br>(n=1197) | Depressive symptoms<br>(n=437) | p        |
|-----------------------------|------------------------------|-------------------------------------|--------------------------------|----------|
| Gender                      | Male (n=720) (n,%)           | 528 (73.33)                         | 192 (26.67)                    | 0.950 ** |
|                             | Female (n=914) (n,%)         | 669 (73.19)                         | 245 (26.81)                    |          |
| Age (mean ± SD)             |                              | 73.59 ± 7.02                        | 76.89 ± 7.97                   | <0.001*  |
| Height (mean ± SD)          |                              | 156.04 ± 8.93                       | 154.55 ± 9.76                  | 0.005*   |
| Body weight (mean ± SD)     |                              | 56.39 ± 10.24                       | 53.90 ± 11.23                  | <0.001*  |
| BMI (mean ± SD)             |                              | 23.06 ± 3.06                        | 22.43 ± 3.41                   | <0.001*  |
| Underweight (n=115) (n,%)   |                              | 68 (59.13)                          | 47 (40.87)                     |          |
| BMI group                   | Normal weight (n=1141) (n,%) | 837 (73.36)                         | 304 (26.64)                    | 0.001**  |
|                             | Overweight                   | 292 (77.25)                         | 86 (22.75)                     |          |
| Energy kcal/day (mean ± SD) |                              | 1856.96 ± 616.97                    | 1732.83 ± 585.03               | <0.001*  |
| Protein (mean ± SD)         |                              | 39.63 ± 3.27                        | 38.55 ± 7.91                   | 0.020*   |
| Lipid (mean ± SD)           |                              | 27.70 ± 6.51                        | 26.97 ± 6.61                   | 0.047*   |
| Carbohydrate (mean ± SD)    |                              | 137.26 ± 21.36                      | 141.68 ± 20.96                 | <0.001*  |

\*\* Chi-square test; \* t-test; SD: standard deviation

Table S2: Odds ratios (95% CI) for depressive symptoms outcomes according to vitamin intake in all participants

| Vitamin (g/1000 kcal)    | Univariate |                     |       | Multivariate* |                     |       |
|--------------------------|------------|---------------------|-------|---------------|---------------------|-------|
|                          | B          | OR (95%CI)          | p     | B             | OR (95%CI)          | p     |
| Vitamin A1               | -0.001     | 0.999(0.999-1.000)  | 0.111 | 0.000         | 1.000 (0.999-1.000) | 0.364 |
| Beta-carotene equivalent | 0.000      | 1.000 (1.000-1.000) | 0.006 | 0.000         | 1.000 (1.000-1.000) | 0.001 |
| Retinol equivalent       | -0.001     | 0.999 (0.999-1.000) | 0.005 | -0.001        | 0.999 (0.999-1.000) | 0.017 |
| Vitamin D                | -0.019     | 0.981 (0.962-1.001) | 0.065 | -0.002        | 0.998 (0.973-1.024) | 0.876 |
| Alpha-tocopherol         | -0.169     | 0.844 (0.765-0.932) | 0.001 | -0.149        | 0.861 (0.753-0.985) | 0.030 |

|                |        |                     |        |        |                     |        |
|----------------|--------|---------------------|--------|--------|---------------------|--------|
| Vitamin K      | -0.003 | 0.997 (0.996-0.998) | <0.001 | -0.003 | 0.997 (0.996-0.999) | <0.001 |
| Vitamin B1     | -1.684 | 0.186 (0.061-0.563) | 0.003  | -1.495 | 0.224 (0.054-0.927) | 0.039  |
| Vitamin B2     | -0.748 | 0.473 (0.274-0.819) | 0.007  | -0.608 | 0.544 (0.265-1.117) | 0.097  |
| Vitamin B3     | -0.089 | 0.915 (0.879-0.953) | <0.001 | -0.048 | 0.953 (0.900-1.009) | 0.098  |
| Vitamin B5     | -0.224 | 0.800 (0.692-0.924) | 0.003  | -0.201 | 0.818 (0.679-0.984) | 0.033  |
| Vitamin B6     | -1.217 | 0.296 (0.165-0.531) | <0.001 | -1.099 | 0.333 (0.152-0.730) | 0.006  |
| Vitamin B9     | -0.004 | 0.996 (0.995-0.998) | <0.001 | -0.004 | 0.996 (0.994-0.998) | <0.001 |
| Vitamin B12    | -0.050 | 0.952 (0.919-0.986) | 0.006  | -0.025 | 0.975 (0.931-1.021) | 0.289  |
| Vitamin C      | -0.007 | 0.993 (0.989-0.996) | <0.001 | -0.008 | 0.992 (0.988-0.996) | <0.001 |
| Cryptoxanthine | -0.001 | 0.999 (0.998-1.000) | 0.020  | -0.001 | 0.999 (0.998-1.000) | 0.036  |

\*Adjusted for Gender, Age, Height, Weight, BMI, Living condition, Marital status, Drinking alcohol, Smoking status, Energy, Carbohydrates, Hypertension, Diabetes, Hyperlipidemia  
B: beta coefficient; OR: odd ratio, CI: confidence interval

Table S3: Odds ratios (95% CI) for depressive symptoms outcomes according to vitamin intake stratified by BMI in all participants

| Vitamin (g/1000 kcal)    | Underweight |                      |       | Normal weight |                     |       | Overweight |                     |       |
|--------------------------|-------------|----------------------|-------|---------------|---------------------|-------|------------|---------------------|-------|
|                          | B           | OR (95%CI)           | p     | B             | OR (95%CI)          | p     | B          | OR (95%CI)          | p     |
| Vitamin A1               | -0.001      | 0.999 (0.995-1.003)  | 0.648 | 0.000         | 1.000 (0.999-1.000) | 0.688 | -0.001     | 0.999 (0.997-1.001) | 0.253 |
| Beta-carotene equivalent | 0.000       | 1.000 (1.000-1.000)  | 0.950 | 0.000         | 1.000 (1.000-1.000) | 0.006 | 0.000      | 1.000 (1.000-1.000) | 0.046 |
| Retinol equivalent       | 0.000       | 1.000 (0.997-1.003)  | 0.795 | -0.001        | 0.999 (0.999-1.000) | 0.155 | -0.002     | 0.998 (0.996-1.000) | 0.040 |
| Vitamin D                | 0.104       | 1.110 (0.984-1.251)  | 0.089 | -0.007        | 0.993 (0.964-1.024) | 0.669 | 0.001      | 1.001 (0.943-1.063) | 0.975 |
| Alpha-tocopherol         | -0.036      | 0.965 (0.574-1.620)  | 0.892 | -0.146        | 0.864 (0.735-1.015) | 0.075 | -0.139     | 0.870 (0.640-1.183) | 0.375 |
| Vitamin K                | -0.002      | 0.998 (0.992-1.003)  | 0.396 | -0.002        | 0.998 (0.996-0.999) | 0.003 | -0.004     | 0.996 (0.992-0.999) | 0.014 |
| Vitamin B1               | 0.027       | 1.027 (0.003-308.64) | 0.993 | -1.452        | 0.234 (0.042-1.309) | 0.098 | -2.994     | 0.050 (0.002-1.248) | 0.068 |
| Vitamin B2               | 0.085       | 1.089 (0.027-43.299) | 0.964 | -0.466        | 0.628 (0.269-1.467) | 0.282 | -1.188     | 0.305 (0.061-1.530) | 0.149 |
| Vitamin B3               | 0.055       | 1.056 (0.816-1.367)  | 0.678 | -0.042        | 0.959 (0.896-1.026) | 0.223 | -0.056     | 0.946 (0.832-1.075) | 0.392 |
| Vitamin B6               | -0.402      | 0.669 (0.040-11.171) | 0.780 | -0.920        | 0.398 (0.155-1.023) | 0.056 | -1.986     | 0.137 (0.023-0.832) | 0.031 |
| Vitamin B12              | 0.093       | 1.097 (0.882-1.365)  | 0.407 | -0.021        | 0.979 (0.927-1.034) | 0.452 | -0.036     | 0.965 (0.865-1.076) | 0.519 |
| Vitamin B9               | -0.001      | 0.999 (0.991-1.006)  | 0.723 | -0.004        | 0.996 (0.994-0.999) | 0.002 | -0.006     | 0.994 (0.990-0.999) | 0.013 |
| Vitamin B5               | -0.118      | 0.888 (0.393-2.007)  | 0.776 | -0.185        | 0.831 (0.665-1.038) | 0.103 | -0.288     | 0.750 (0.497-1.129) | 0.168 |
| Vitamin C                | -0.004      | 0.997 (0.982-1.012)  | 0.650 | -0.006        | 0.994 (0.989-0.998) | 0.009 | -0.013     | 0.987 (0.978-0.997) | 0.014 |
| Cryptoxanthine           | -0.001      | 0.999 (0.996-1.002)  | 0.468 | -0.001        | 0.999 (0.998-1.000) | 0.096 | -0.001     | 0.999 (0.998-1.001) | 0.613 |

\*Adjusted for Age, Height, Weight, BMI, Living condition, Marital status, Drinking alcohol, Smoking status, Energy, Carbohydrates, Hypertension, Diabetes, Hyperlipidemia  
B: beta coefficient; OR: odd ratio, CI: confidence interval

Table S4: Odds ratios (95% CI) for depressive symptoms outcomes according to vitamin intake stratified by BMI in males

| Vitamin (g/1000 kcal) | Normal weight |            |   | Over weight |            |   |
|-----------------------|---------------|------------|---|-------------|------------|---|
|                       | B             | OR (95%CI) | P | B           | OR (95%CI) | P |

|                          |        |                      |       |        |                     |       |
|--------------------------|--------|----------------------|-------|--------|---------------------|-------|
| Vitamin A1               | 0.000  | 1.000 (0.999-1.001)  | 0.987 | -0.001 | 0.999 (0.997-1.002) | 0.550 |
| Beta-carotene equivalent | 0.000  | 1.000 (1.000-1.000)  | 0.104 | 0.000  | 1.000 (0.999-1.000) | 0.242 |
| Retinol equivalent       | 0.000  | 1.000 (0.999-1.000)  | 0.733 | -0.001 | 0.999 (0.996-1.001) | 0.279 |
| Vitamin D                | 0.029  | 1.029 (0.979-1.082)  | 0.265 | 0.048  | 1.049 (0.972-1.132) | 0.217 |
| Alpha-tocopherol         | 0.015  | 1.015 (0.797-1.291)  | 0.905 | -0.070 | 0.932 (0.605-1.437) | 0.751 |
| Vitamin K                | -0.003 | 0.997 (0.995-1.000)  | 0.045 | -0.002 | 0.998 (0.993-1.003) | 0.430 |
| Vitamin B1               | 0.066  | 1.068 (0.079-14.401) | 0.961 | -3.304 | 0.037 (0.000-3.619) | 0.158 |
| Vitamin B2               | 0.021  | 1.021 (0.310-3.366)  | 0.973 | -0.386 | 0.680 (0.066-6.977) | 0.745 |
| Vitamin B3               | -0.010 | 0.990 (0.896-1.094)  | 0.847 | -0.064 | 0.938 (0.781-1.127) | 0.496 |
| Vitamin B6               | 0.193  | 1.213 (0.274-5.369)  | 0.799 | -1.973 | 0.139 (0.010-2.008) | 0.148 |
| Vitamin B12              | 0.033  | 1.033 (0.955-1.118)  | 0.415 | 0.032  | 1.032 (0.893-1.193) | 0.667 |
| Vitamin B9               | -0.002 | 0.998 (0.994-1.001)  | 0.190 | -0.004 | 0.996 (0.989-1.002) | 0.204 |
| Vitamin B5               | -0.045 | 0.956 (0.692-1.320)  | 0.785 | -0.027 | 0.973 (0.543-1.746) | 0.928 |
| Vitamin C                | -0.001 | 0.999 (0.991-1.006)  | 0.746 | -0.013 | 0.987 (0.973-1.002) | 0.095 |
| Cryptoxanthine           | 0.001  | 1.001 (0.999-1.002)  | 0.401 | 0.000  | 1.000 (0.997-1.003) | 0.934 |

\*Adjusted for Gender, Age, Height, Weight, BMI, Living condition, Marital status, Drinking alcohol, Smoking status, Energy, Carbohydrates, Hypertension, Diabetes, Hyperlipidemia  
 B: beta coefficient; OR: odd ratio, CI: confidence interval
